# Supplementary material for: Unraveling energetics and states of adsorbing oxygen species with MoS2 for modulated work function
Source: Royal Society of Chemistry journal article supplement (doi:10.1039/d4nh00441h), 2024-11-06
Supplement: d4nh00441h1.pdf [file d4nh00441h1.pdf]

## Supplemental Information

# Unraveling Energetics and States of Adsorbing Oxygen

## Species with MoS<sub>2</sub> for Modulated Work Function†

Hejin Yan<sup>a</sup>, Hongfei Chen<sup>a</sup>, Xiangyue Cui<sup>a</sup>, Qiye Guan<sup>a</sup>, Bowen Wang<sup>a</sup>, Yongqing Cai<sup>a\*</sup>

<sup>a</sup>Joint Key Laboratory of the Ministry of Education, Institute of Applied Physics and Materials Engineering, University of Macau, Taipa, Macau, China

\*Corresponding Author

Yongqing Cai\* E-mail: [yongqingcai@um.edu.mo](mailto:yongqingcai@um.edu.mo)

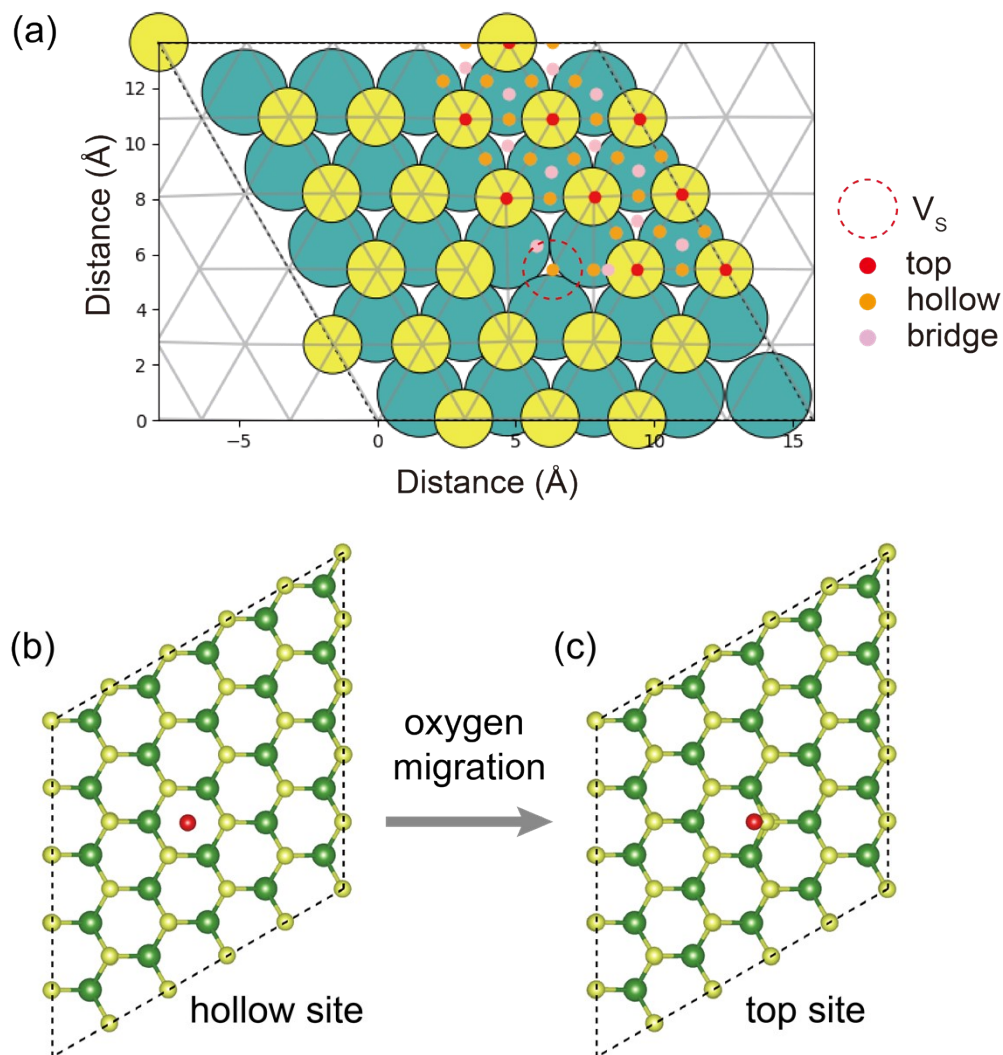

**Fig. S1** (a) Screened nonequivalent adsorption sites for adsorption on the V<sub>S</sub> containing MoS<sub>2</sub> surface, including the top, hollow, and bridge sites. The hollow site adsorption of oxygen before (b) and after (c) structure optimization. The initial hollow site structure is unstable, and it converts to a top site adsorption.

**Supplementary note:** The ASE library is used to search for the nonequivalent adsorption sites on the V<sub>S</sub> containing MoS<sub>2</sub> surface.<sup>1, 2</sup> There are 9 atop, 12 hollow, and 21 bridge sites in the model. In Fig. S1a, some sulfur atoms at the edge are missing due to periodic display, the V<sub>S</sub> are marked by red dashed circle.

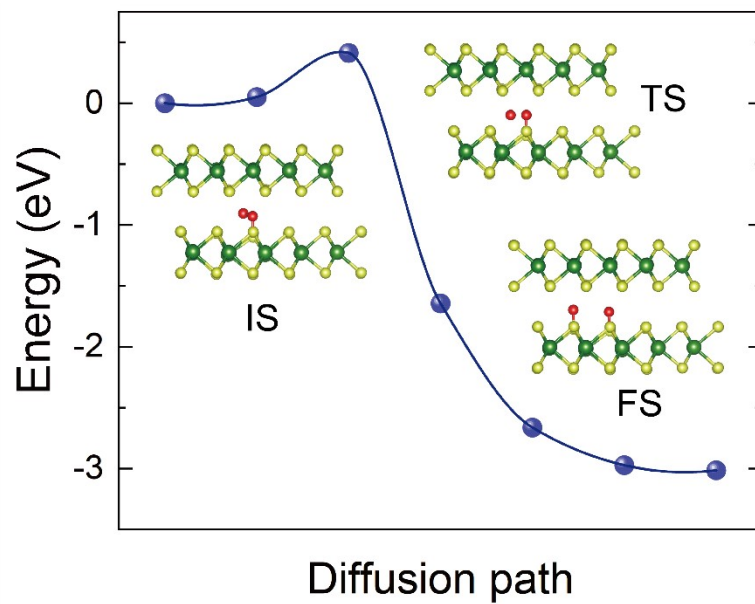

**Fig. S2** Activation energy for oxygen dissociation within the vdWs gap of O<sub>2(Sorb)</sub>.

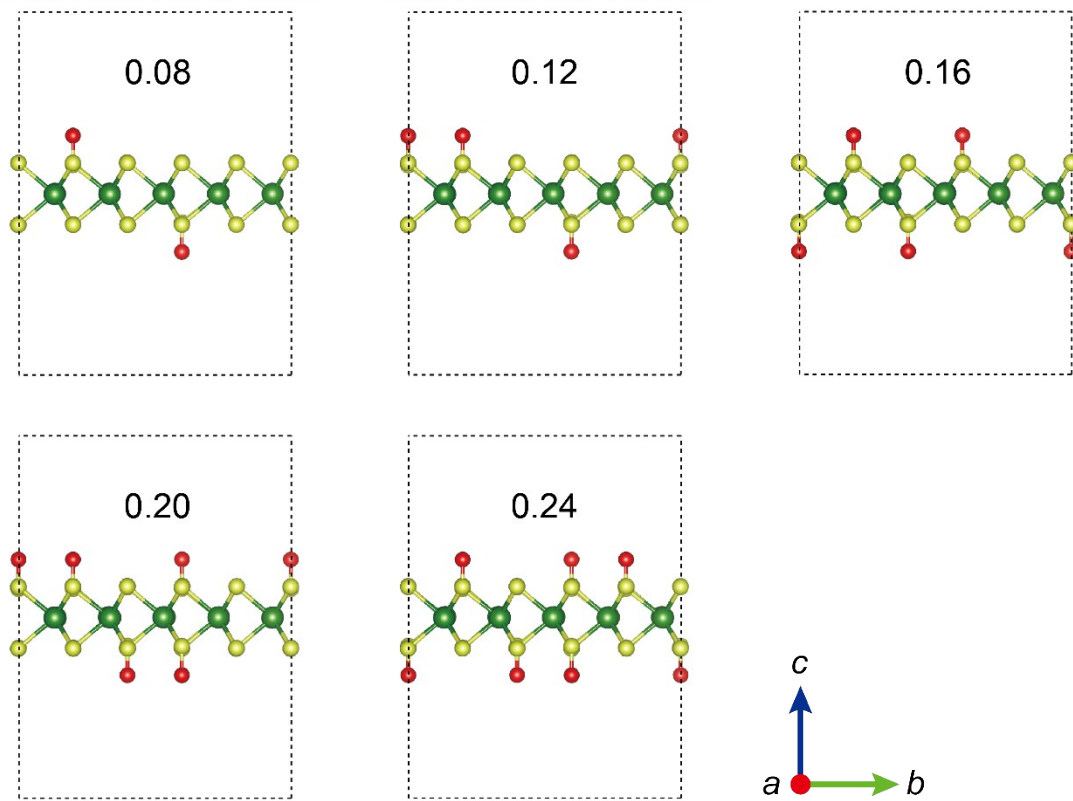

**Fig. S3** Optimized structures of  $O_{\text{Top}}$  of different oxygen concentration for both facets situation.

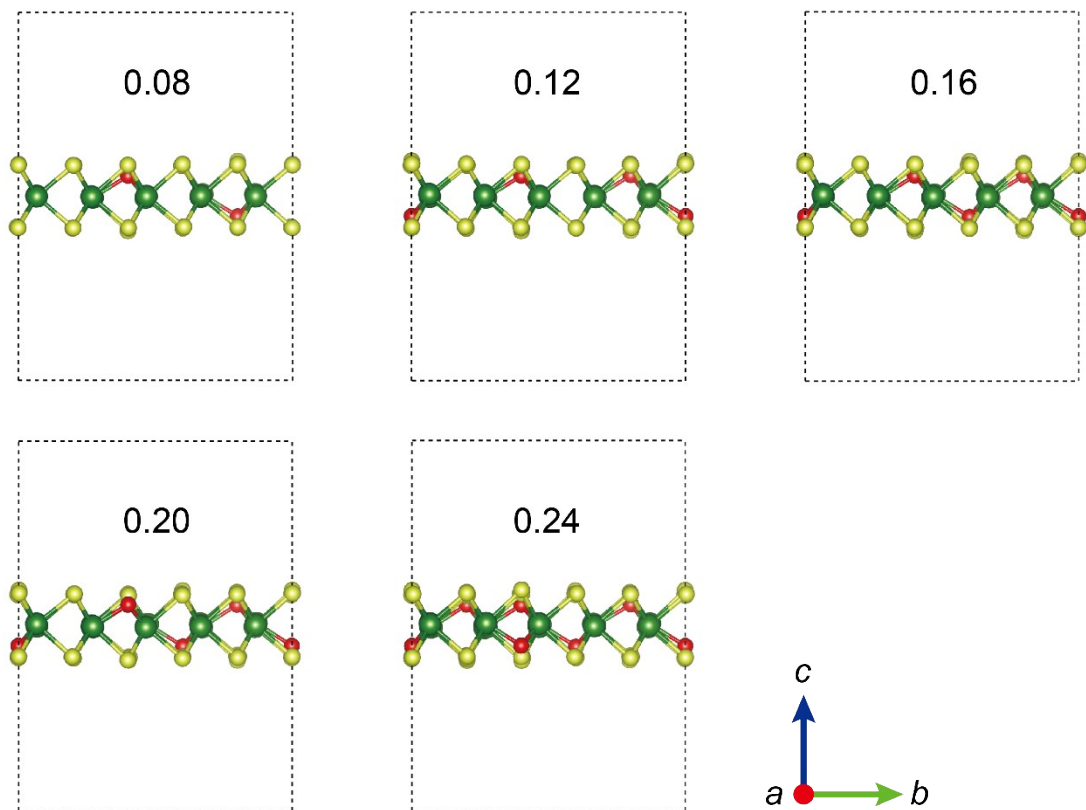

**Fig. S4** Optimized structures of O<sub>5</sub> of different oxygen concentration for both facets situation.

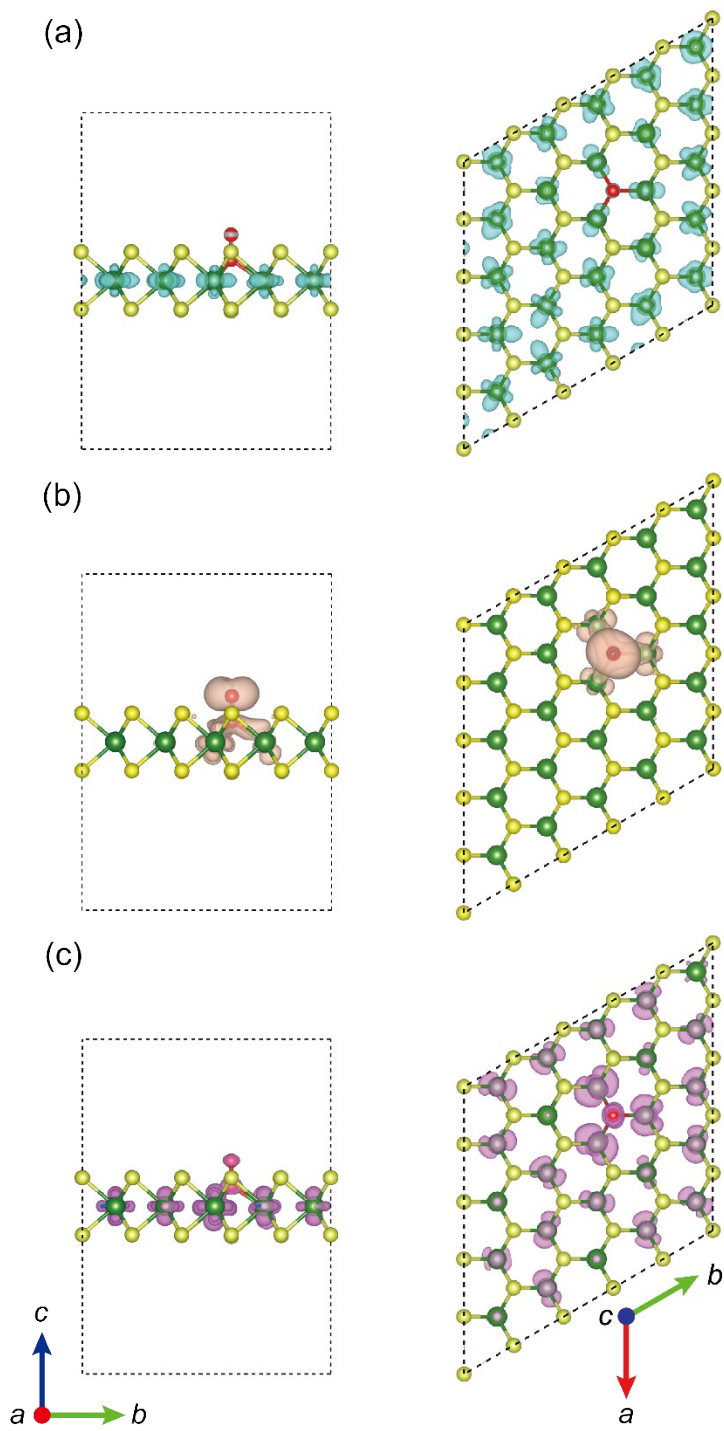

**Fig. S5** Charge density distribution of (a) VBM, (b) in-gap states, and (c) CBM in  $\text{O}_{2(\text{Sub})}$  with an iso-surface of  $1.5 \times 10^{-3} e$ .

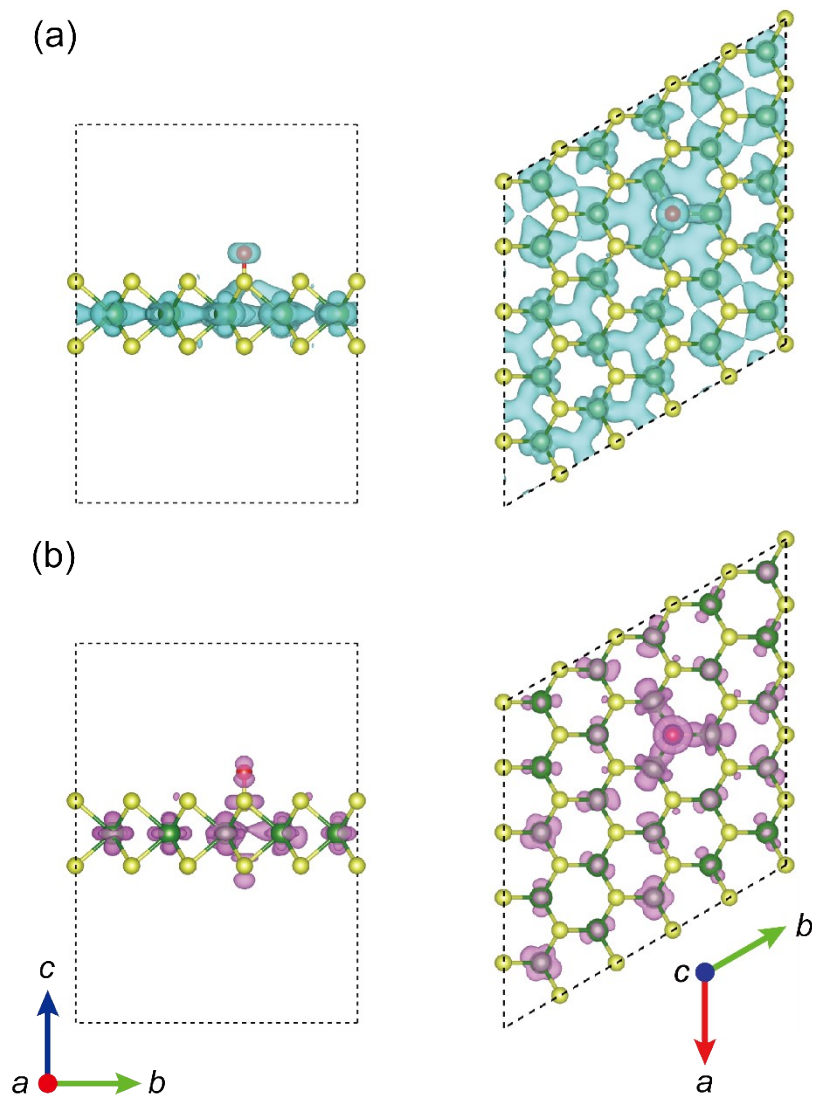

**Fig. S6** Charge density distribution of (a) VBM and (b) CBM in  $O_{\text{Top}}$  with an iso-surface of  $1.5 \times 10^{-3} e$ .

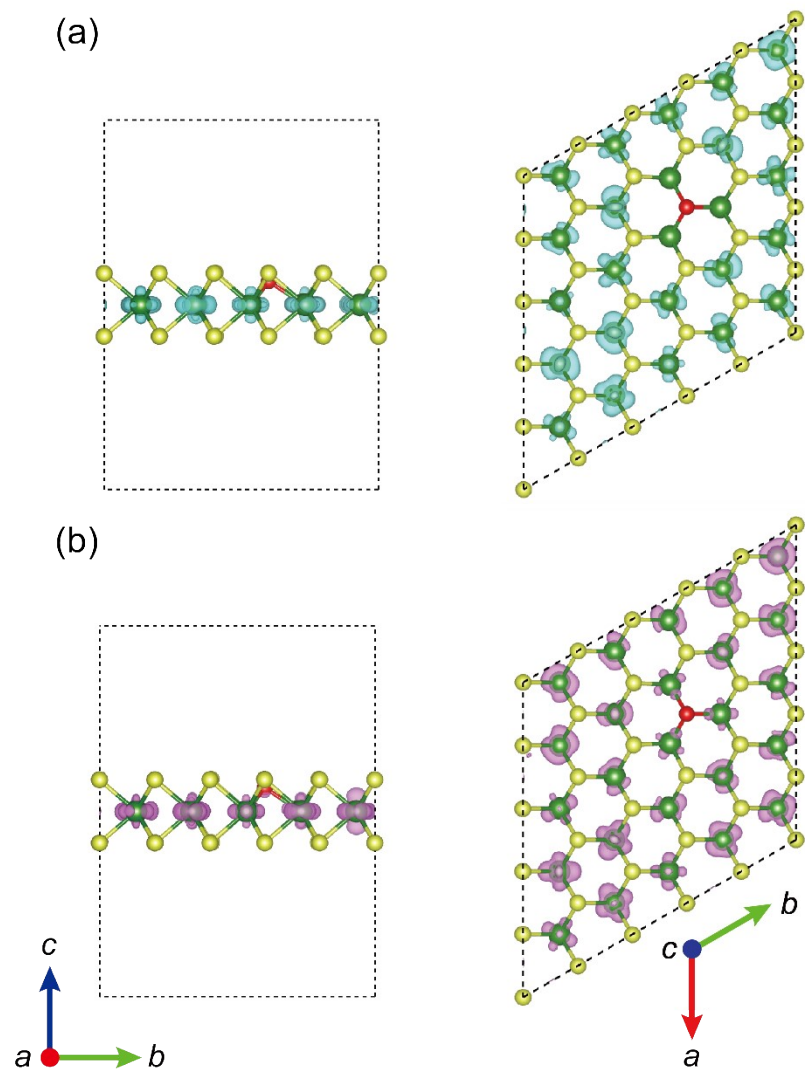

**Fig. S7** Charge density distribution of (a) VBM and (b) CBM in  $O_5$  with an iso-surface of  $1.5 \times 10^{-3} e$ .



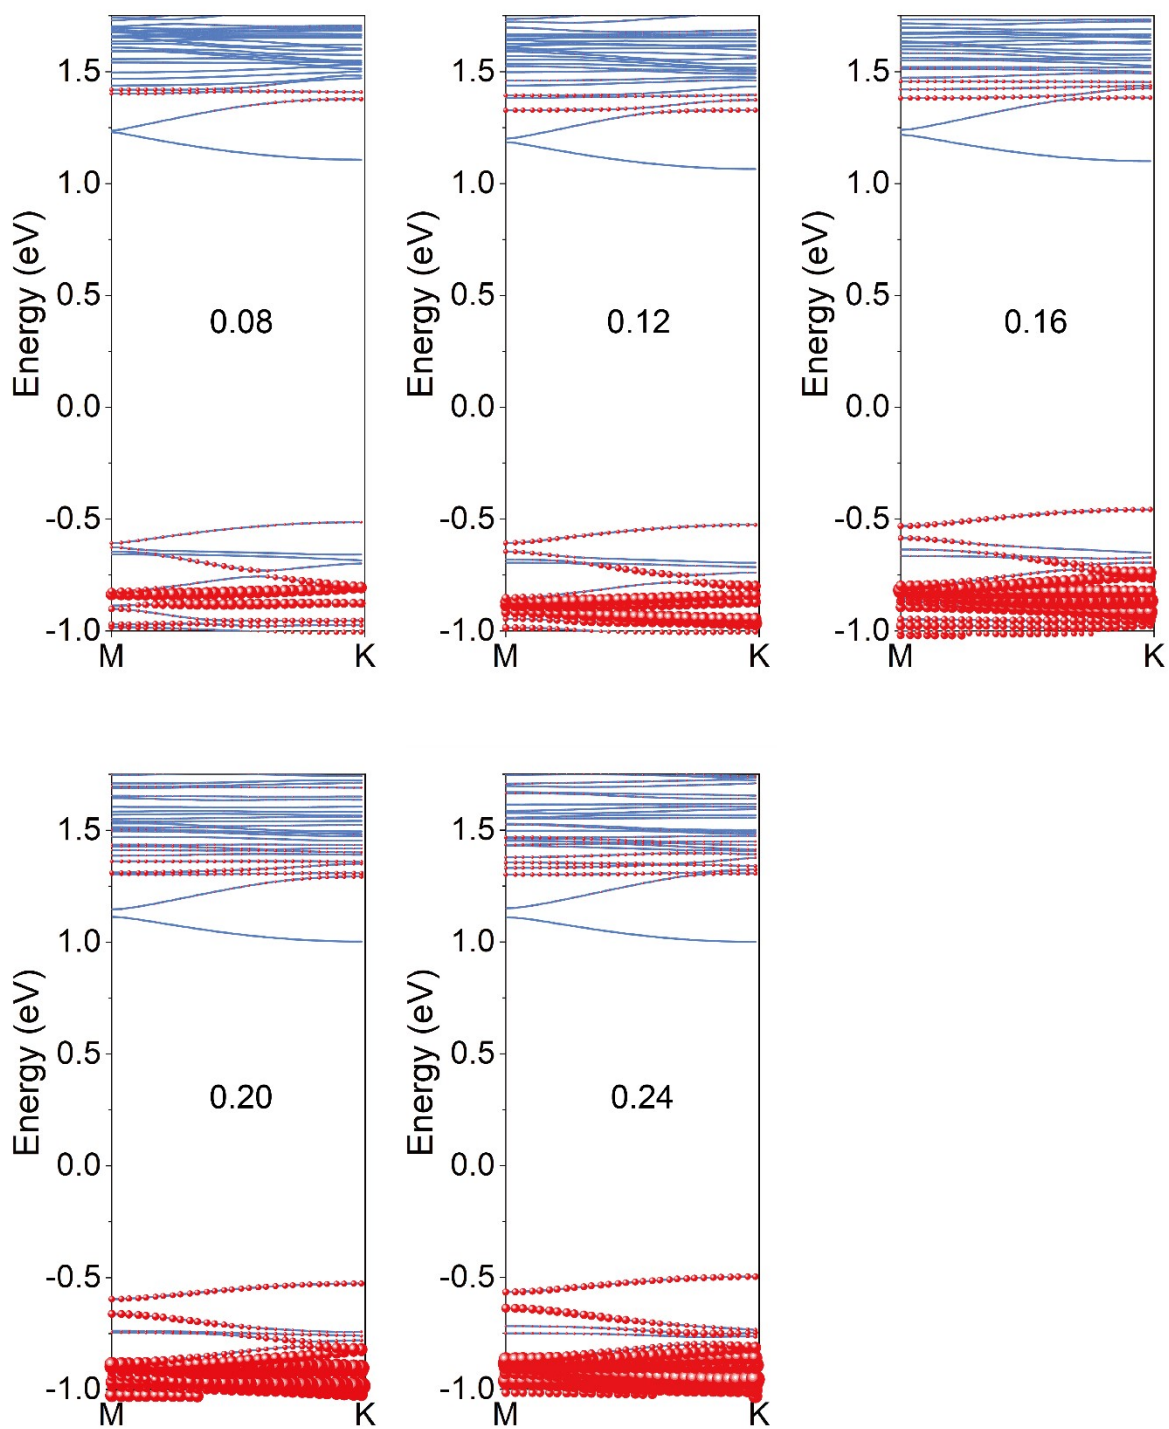

**Fig. S8** Oxygen contribution projected band structures of  $O_{\text{Top}}$  of different oxygen concentration for both facets situation.

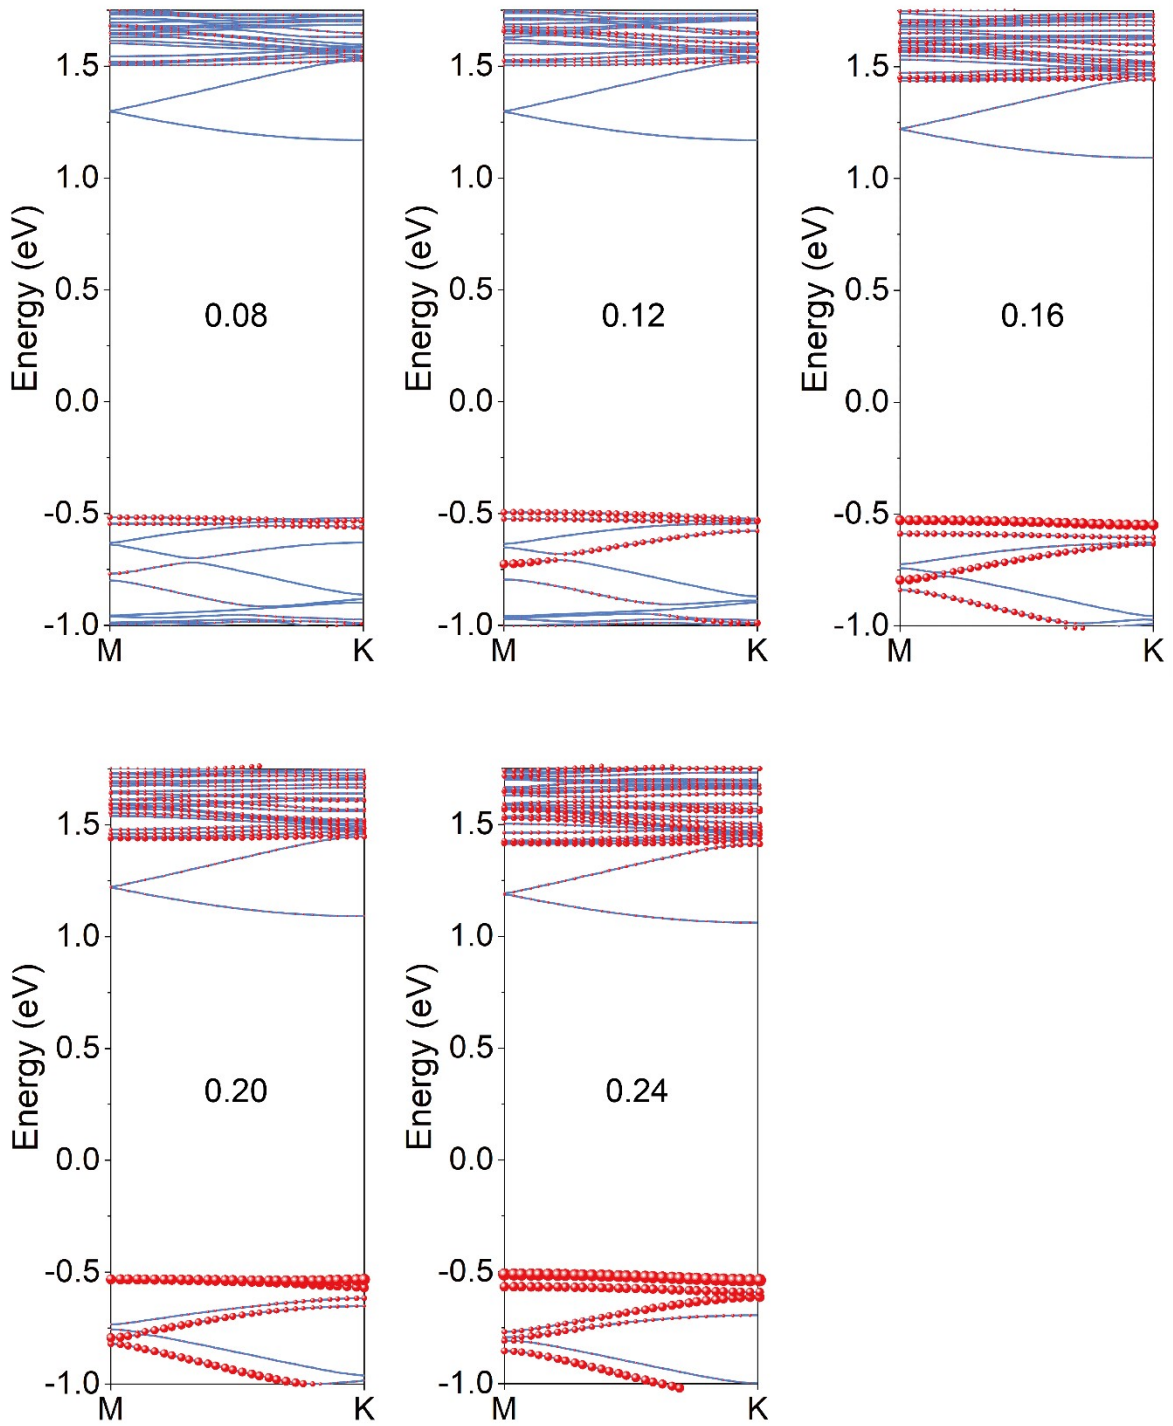

**Fig. S9** Oxygen contribution projected band structures of  $O_S$  of different oxygen concentration for both facets situation.

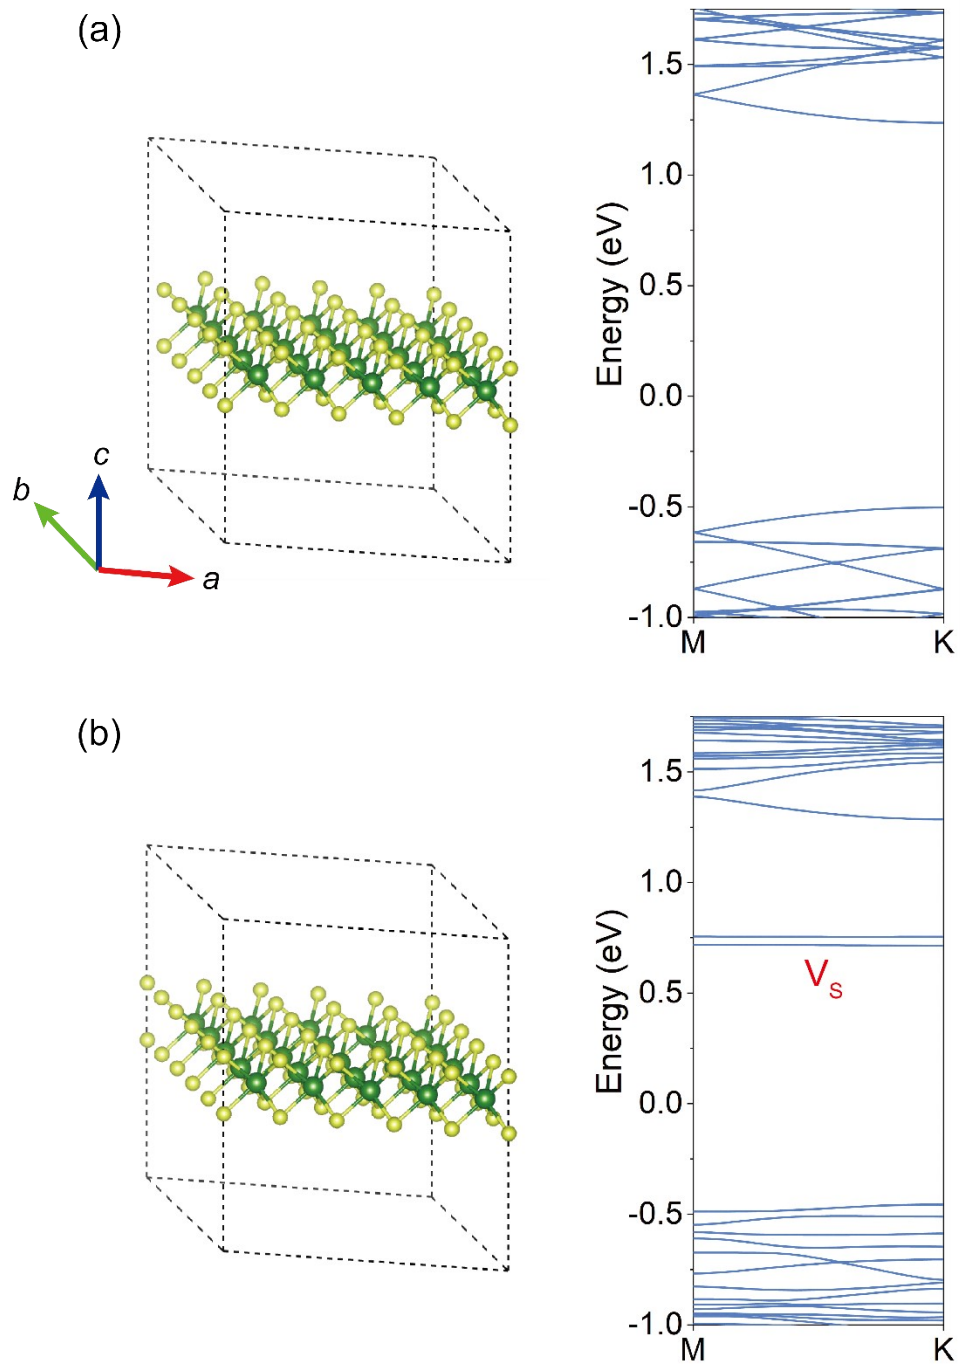

**Fig. S10** Atomic structure and band structure of monolayer MoS<sub>2</sub> without (a) and with (b) V<sub>S</sub>.

Flat in-gap states exist in the case of V<sub>S</sub>.

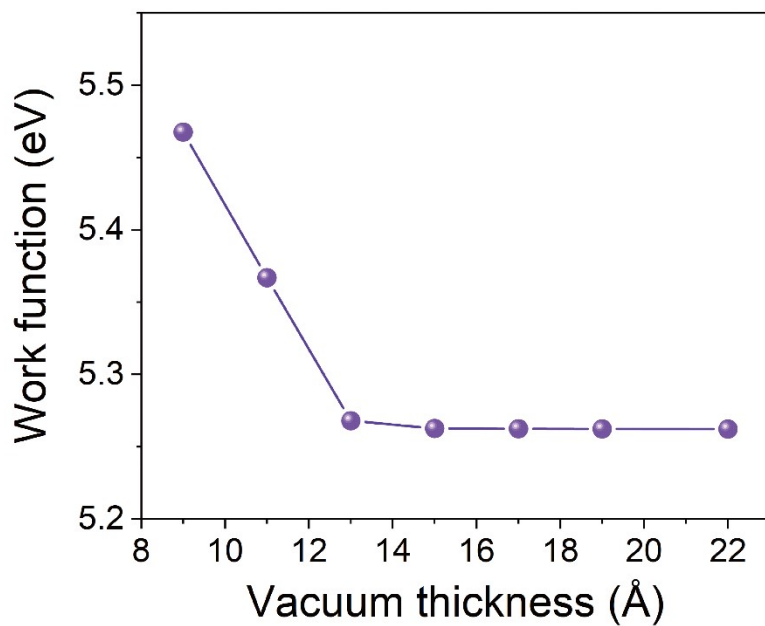

**Fig. S11** Convergence test for the vacuum layer thickness dependent work function in MoS<sub>2</sub> monolayer.

**Table S1** Formation energy for various O adsorbates on MoS<sub>2</sub> under S-poor ( $\mu_{S,min}$ ) and S-rich ( $\mu_{S,max}$ ) conditions.

| Adsorbate type       | Formation energy (eV) |               |
|----------------------|-----------------------|---------------|
|                      | $\mu_{S,min}$         | $\mu_{S,max}$ |
| O <sub>2(Sorb)</sub> | 1.72                  | 1.72          |
| O <sub>2(Sub)</sub>  | -1.03                 | 0.26          |
| O <sub>Top</sub>     | -1.17                 | -1.17         |
| O <sub>S</sub>       | -3.24                 | -1.96         |

**Table S2** Lattice parameters of O<sub>Top</sub> of different oxygen concentration for both facets situation.

| Oxygen concentration | <i>a</i> (Å) |
|----------------------|--------------|
| 0.08                 | 15.93490     |
| 0.12                 | 15.94300     |
| 0.16                 | 15.95240     |
| 0.20                 | 15.96030     |
| 0.24                 | 15.97134     |

**Table S3** Lattice parameters of O<sub>S</sub> of different oxygen concentration for both facets situation.

| Oxygen concentration | <i>a</i> (Å) |
|----------------------|--------------|
| 0.08                 | 15.83550     |
| 0.12                 | 15.79550     |
| 0.16                 | 15.75520     |
| 0.20                 | 15.71490     |
| 0.24                 | 15.67670     |

**References:**

1. A. H. Larsen, J. J. Mortensen, J. Blomqvist, I. E. Castelli, R. Christensen, M. Dułak, J. Friis, M. N. Groves, B. Hammer and C. Hargus, *J. Phys.: Condens. Matter*, 2017, **29**, 273002.
2. Z. Zhang, Z.-H. Cui, E. Jimenez-Izal, P. Sautet and A. N. Alexandrova, *ACS Catal.*, 2020, **10**, 13867-13877.
